# Supplementary material
Source: publisher figshare collection journal article supplement (https://sage.figshare.com/ndownloader/files/14652161)

Supplemental Figure 4:

Responders of headache questionnaire by school type and age

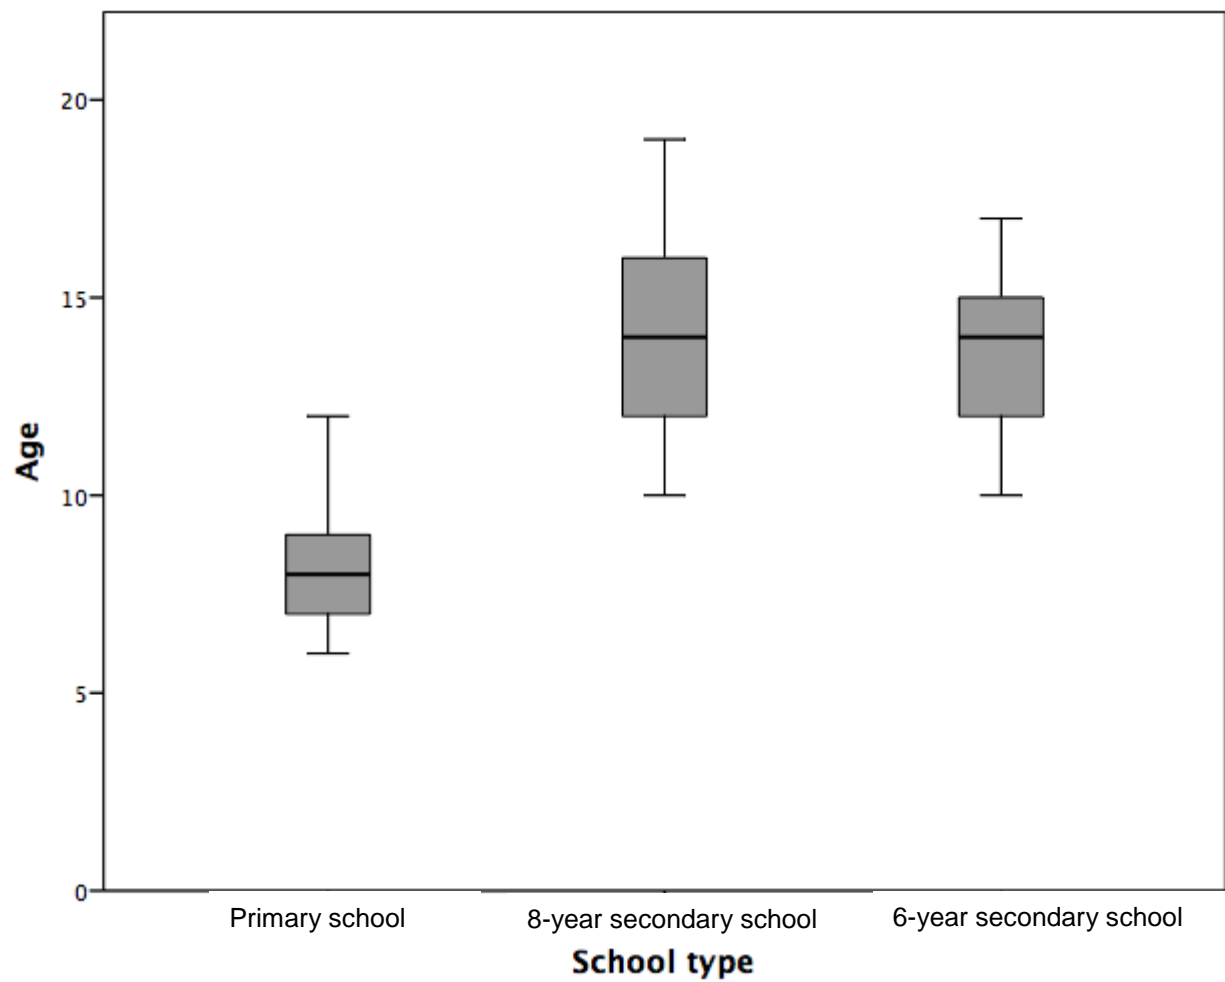

Supplement: Supplementary file 1 [file 14652161]
